# Supplementary material for: Human Liver Macrophage Subsets Defined by CD32
Source: PubMed Central journal article supplement (PMC7546764; doi:10.3389/fimmu.2020.02108), 2020-09-23
Supplement: Table_1.pdf [file Table_1.pdf]

Table S1 Patient information

| Patient ID | Gender | Age | Diagnosis                                           | Cell sorting and gene expression analysis | Flow analysis, BDCA1, BDCA3 panel | Flow analysis, CD16, CD206 panel |
|------------|--------|-----|-----------------------------------------------------|-------------------------------------------|-----------------------------------|----------------------------------|
| PT-1       | F      | 67  | Metastatic ovarian cancer                           | Y                                         |                                   |                                  |
| PT-2       | F      | 38  | Adenoma                                             | Y                                         |                                   |                                  |
| PT-3       | M      | 36  | Cholangiocarcinoma                                  | Y                                         |                                   |                                  |
| PT-4       | M      | 71  | Metastatic gastric cancer                           |                                           | Y                                 | Y                                |
| PT-5       | F      | 27  | Metastatic colorectal cancer (mCRC)                 |                                           | Y                                 | Y                                |
| PT-6       | F      | 69  | Metastatic high-grade serous carcinoma              |                                           | Y                                 | Y                                |
| PT-7       | F      | 26  | Adenoma                                             |                                           | Y                                 | Y                                |
| PT-8       | M      | 54  | mCRC                                                |                                           | Y                                 | Y                                |
| PT-9       | F      | 60  | Intrahepatic cholangiocarcinoma                     |                                           | Y                                 |                                  |
| PT-10      | F      | 63  | Metastatic duodenal gastrointestinal stromal tumors |                                           | Y                                 |                                  |
| PT-11      | M      | 59  | Cholangiocarcinoma                                  |                                           | Y                                 |                                  |
| PT-12      | F      | 26  | Adenoma                                             |                                           | Y                                 |                                  |
| PT-13      | F      | 50  | Metastatic gastrointestinal stromal tumor           |                                           |                                   | Y                                |
| PT-14      | M      | 33  | Epithelioid hemangioendothelioma                    |                                           |                                   | Y                                |
| PT-15      | F      | 32  | Epithelioid hemangioendothelioma                    |                                           |                                   | Y                                |
| PT-16      | F      | 55  | mCRC                                                |                                           |                                   | Y                                |
| PT-17      | F      | 57  | Metastatic granulosa cell tumor                     |                                           |                                   | Y                                |
| PT-18      | M      | 72  | mCRC                                                |                                           |                                   | Y                                |
| PT-19      | F      | 52  | mCRC, mild steatosis                                |                                           |                                   | Y                                |
| PT-20      | F      | 84  | Hepatocellular carcinoma (HCC) and steatosis        |                                           |                                   | Y                                |
| PT-21      | F      | 50  | mCRC                                                |                                           |                                   | Y                                |
| PT-22      | F      | 55  | mCRC                                                |                                           |                                   | Y                                |
| PT-23      | F      | 47  | mCRC                                                |                                           |                                   | Y                                |
| PT-24      | M      | 54  | Metastatic pancreatic cancer                        |                                           |                                   | Y                                |
| PT-25      | F      | 58  | mCRC                                                |                                           |                                   | Y                                |
| PT-26      | M      | 57  | mCRC                                                |                                           |                                   | Y                                |
