# Supplementary material for: Human Liver Macrophage Subsets Defined by CD32
Source: PubMed Central journal article supplement (PMC7546764; doi:10.3389/fimmu.2020.02108), 2020-09-23
Supplement: Table_2.pdf [file Table_2.pdf]

Table S2: list of all genes assayed by qRT-PCR

| Assay # | Gene name | GeneBank Accession ID | NCBI protein ID | UniprotID |
|---------|-----------|-----------------------|-----------------|-----------|
| 1       | ACTB      | NM_001101.3           | NP_001092.1     | P60709    |
| 2       | GAPDH     | NM_001256799.2        | NP_001243728.1  | P04406    |
| 3       | HPRT1     | NM_000194.2           | NP_000185.1     | P00492    |
| 4       | TNF       | NM_000594.3           | NP_000585.2     | P01375    |
| 5       | IL-6      | NM_000600.4           | NP_000591.1     | P05231    |
| 6       | COL1A1    | NM_000088.3           | NP_000079.2     | P02452    |
| 7       | COL3A1    | NM_000090.3           | NP_000081.1     | P02461    |
| 8       | CTGF      | NM_001901.2           | NP_001892.1     | P29279    |
| 9       | MMP9      | NM_004994.2           | NP_004985.2     | P14780    |
| 10      | PDGFB     | NM_002608.3           | NP_002599.1     | P01127    |
| 11      | PDGFRA    | NM_006206.4           | NP_006197.1     | P16234    |
| 12      | TGFB1     | NM_000660.5           | NP_000651.3     | P01137    |
| 13      | TIMP1     | NM_003254.2           | NP_003245.1     | P01033    |
| 14      | CCL2      | NM_002982.3           | NP_002973.1     | P13500    |
| 15      | CCL3      | NM_002983.2           | NP_002974.1     | P10147    |
| 16      | CCL5      | NM_002985.2           | NP_002976.2     | P13501    |
| 17      | CCL7      | NM_006273.3           | NP_006264.2     | P80098    |
| 18      | CX3CL1    | NM_002996.4           | NP_002987.1     | P78423    |
| 19      | CXCL10    | NM_001565.3           | NP_001556.2     | P02778    |
| 20      | IL-8      | NM_000584.3           | NP_000575.1     | P10145    |
| 21      | CASP1     | NM_001223.4           | NP_001214.1     | P29466    |
| 22      | IL-1B     | NM_000576.2           | NP_000567.1     | P01584    |
| 23      | IL-18     | NM_001243211.1        | NP_001230140.1  | Q14116    |
| 24      | NLRP3     | NM_001079821.2        | NP_001073289.1  | Q96P20    |
| 25      | IFNA1     | NM_024013.2           | NP_076918.1     | P01562    |
| 26      | IFNB1     | NM_002176.3           | NP_002167.1     | P01574    |
| 27      | IFNG      | NM_000619.2           | NP_000610.2     | P01579    |
| 28      | IL-28B    | NM_172139.2           | NP_742151.2     | Q8IZJ0    |
| 29      | IFIT1     | NM_001270927.1        | NP_001257856.1  | P09914    |
| 30      | IFIT2     | NM_001547.4           | NP_001538.4     | P09913    |
| 31      | IFIT3     | NM_001031683.3        | NP_001026853.1  | O14879    |
| 32      | IL-12B    | NM_002187.2           | NP_002178.2     | P29460    |
| 33      | ISG15     | NM_005101.3           | NP_005092.1     | P05161    |
| 34      | ALB       | NM_000477.5           | NP_000468.1     | P02768    |
| 35      | FBP1      | NM_000507.3           | NP_000498.2     | P09467    |

|    |         |                |                |        |
|----|---------|----------------|----------------|--------|
| 36 | PDGFRB  | NM_002609.3    | NP_002600.1    | P09619 |
| 37 | SLC27A2 | NM_001159629.1 | NP_001153101.1 | O14975 |
| 38 | ACTA2   | NM_001141945.2 | NP_001135417.1 | P62736 |
| 39 | CLEC4F  | NM_001258027.1 | NP_001244956.1 | Q8N1N0 |
| 40 | CXCL13  | NM_006419.2    | NP_006410.1    | O43927 |
| 41 | EMR1    | NM_001256252.1 | NP_001243181.1 | Q14246 |
| 42 | LYVE1   | NM_006691.3    | NP_006682.2    | Q9Y5Y7 |
| 43 | NRP2    | NM_003872.2    | NP_003863.2    | O60462 |
| 44 | PTGS2   | NM_000963.3    | NP_000954.1    | P35354 |
| 45 | TIE1    | NM_001253357.1 | NP_001240286.1 | P35590 |
| 46 | CXCL1   | NM_001511.3    | NP_001502.1    | P09341 |
| 47 | CXCL2   | NM_002089.3    | NP_002080.1    | P19875 |
| 48 | CXCL9   | NM_002416.2    | NP_002407.1    | Q07325 |
| 49 | IL-1A   | NM_000575.4    | NP_000566.3    | P01583 |
| 50 | RSAD2   | NM_080657.4    | NP_542388.2    | Q8WXG1 |
| 51 | MX1     | NM_001144925.2 | NP_001138397.1 | P20591 |
| 52 | IL-12A  | NM_000882.3    | NP_000873.2    | P29459 |
| 53 | IL-10   | NM_000572.2    | NP_000563.1    | P22301 |
| 54 | SLC10A1 | NM_003049.3    | NP_003040.1    | Q14973 |
| 55 | CX3CR1  | NM_001171171.1 | NP_001164642.1 | P49238 |
| 56 | CD81    | NM_001297649.1 | NP_001284578.1 | P60033 |
| 57 | HLA-A   | NM_001242758.1 | NP_001229687.1 | P30443 |
| 58 | HLA-DRA | NM_019111.4    | NP_061984.2    | P01903 |
| 59 | PD-L1   | NM_001267706.1 | NP_001254635.1 | Q9NZQ7 |
| 60 | OX40    | NM_003327.3    | NP_003318.1    | P47741 |
| 61 | 4-1BB   | NM_001561.5    | NP_001552.2    | Q07011 |
| 62 | IDO1    | NM_002164.5    | NP_002155.1    | P14902 |
| 63 | CTLA4   | NM_001037631.2 | NP_001032720.1 | P16410 |
| 64 | CD47    | NM_001777.3    | NP_001768.1    | Q08722 |
| 65 | TIGIT   | NM_173799.3    | NP_776160.2    | Q495A1 |
| 66 | VISTA   | NM_022153.1    | NP_071436.1    | Q9H7M9 |
| 67 | CD40    | NM_001250.5    | NP_001241.1    | P25942 |
| 68 | CD80    | NM_005191.3    | NP_005182.1    | P33681 |
| 69 | CD86    | NM_001206924.1 | NP_001193853.1 | P42081 |
| 70 | CIITA   | NM_000246.3    | NP_000237.2    | P33076 |
| 71 | TNFSF9  | NM_003811.3    | NP_003802.1    | P41273 |
| 72 | TNFSF10 | NM_001190942.1 | NP_001177871.1 | P50591 |
| 73 | TIM3    | NM_032782.4    | NP_116171.3    | Q8TDQ0 |
| 74 | LAG3    | NM_002286.5    | NP_002277.4    | P18627 |
| 75 | ARG1    | NM_000045.3    | NP_000036.2    | P05089 |
| 76 | ICAM1   | NM_000201.2    | NP_000192.2    | P05362 |
| 77 | MARCO   | NM_006770.3    | NP_006761.1    | Q9UEW3 |
| 78 | PD-L2   | NM_025239.3    | NP_079515.2    | Q9BQ51 |

|     |          |                |                |        |
|-----|----------|----------------|----------------|--------|
| 79  | TNFRSF18 | NM_004195.2    | NP_004186.1    | Q9Y5U5 |
| 80  | VCAM1    | NM_001078.3    | NP_001069.1    | P19320 |
| 81  | PDCD1    | NM_005018.2    | NP_005009.2    | Q15116 |
| 82  | FOXP3    | NM_001114377.1 | NP_001107849.1 | Q9BZS1 |
| 83  | FASLG    | NM_000639.2    | NP_000630.1    | P48023 |
| 84  | B7-H3    | NM_001024736.1 | NP_001019907.1 | Q5ZPR3 |
| 85  | B7-H4    | NM_001253849.1 | NP_001240778.1 | Q7Z7D3 |
| 86  | CCR2     | NM_001123396.1 | NP_001116868.1 | P41597 |
| 87  | TLR3     | NM_003265.2    | NP_003256.1    | O15455 |
| 88  | TLR4     | NM_003266.3    | NP_003257.1    | O00206 |
| 89  | TLR7     | NM_016562.3    | NP_057646.1    | Q9NYK1 |
| 90  | TLR8     | NM_016610.3    | NP_057694.2    | Q9NR97 |
| 91  | FCN1     | AK314867.1     | BAG37382.1     | O00602 |
| 92  | S100A12  | NM_005621.1    | NP_005612.1    | P80511 |
| 93  | MNDA     | NM_002432.1    | NP_002423.1    | P41218 |
| 94  | ITGA4    | NM_000885.5    | NP_000876.3    | P13612 |
| 95  | EMCN     | NM_001159694.1 | NP_001153166.1 | Q9ULC0 |
| 96  | VWF      | NM_000552.4    | NP_000543.2    | P04275 |
| 97  | ADGRL4   | NM_022159.3    | NP_071442.2    | Q9HBW9 |
| 98  | TEK      | NM_000459.4    | NP_000450.2    | Q02763 |
| 99  | CALCRL   | NM_001271751.1 | NP_001258680.1 | Q16602 |
| 100 | CD34     | NM_001025109.1 | NP_001020280.1 | P28906 |
| 101 | APOB     | NM_000384.2    | NP_000375.2    | P04114 |
| 102 | UGT2B7   | NM_001074.2    | NP_001065.2    | P16662 |
| 103 | PAH      | NM_000277.1    | NP_000268.1    | P00439 |
| 104 | CYP3A5   | NM_000777.4    | NP_000768.1    | P20815 |
| 105 | IGFBP1   | NM_000596.2    | NP_000587.1    | P08833 |
| 106 | FGFR2    | NM_000141.4    | NP_000132.3    | P21802 |
| 107 | AFM      | NM_001133.2    | NP_001124.1    | P43652 |
| 108 | MRC1     | NM_002438.3    | NP_002429.1    | P22897 |
| 109 | VCAN     | NM_001126336.2 | NP_001119808.1 | P13611 |
| 110 | CD163    | NM_004244.5    | NP_004235.4    | Q86VB7 |
| 111 | CD68     | NM_001040059.1 | NP_001035148.1 | P34810 |
| 112 | CD5L     | NM_005894.2    | NP_005885.1    | O43866 |
| 113 | FCGR2B   | NM_001002273.2 | NP_001002273.1 | P31994 |
| 114 | FCGR2A   | NM_021642.3    | NP_067674.2    | P12318 |
| 115 | VSIG4    | NM_001100431.1 | NP_001093901.1 | Q9Y279 |
| 116 | LYZ      | NM_000239.2    | NP_000230.1    | P61626 |
| 117 | S100A8   | NM_001319196.1 | NP_001306125.1 | P05109 |
| 118 | S100A9   | NM_002965.3    | NP_002956.1    | P06702 |
| 119 | HMOX1    | NM_002133.2    | NP_002124.1    | P09601 |
| 120 | MERTK    | NM_006343.2    | NP_006334.2    | Q12866 |
| 121 | FIZZ1    | NM_032579.2    | NP_115968.1    | Q9BQ08 |

|     |         |                |                |        |
|-----|---------|----------------|----------------|--------|
| 122 | IL4     | NM_000589.3    | NP_000580.1    | P05112 |
| 123 | IL13    | NM_002188.2    | NP_002179.2    | P35225 |
| 124 | IL4R    | NM_000418.3    | NP_000409.1    | P24394 |
| 125 | LRAT    | NM_001301645.1 | NP_001288574.1 | O95237 |
| 126 | CYP1B1  | NM_000104.3    | NP_000095.2    | Q16678 |
| 127 | CYP26A1 | NM_000783.3    | NP_000774.2    | O43174 |
| 128 | AOX1    | NM_001159.3    | NP_001150.3    | Q06278 |
| 129 | RBP4    | NM_001323517.1 | NP_001310446.1 | P02753 |
| 130 | RBP1    | NM_001130992.1 | NP_001124464.1 | P09455 |
| 131 | STRA6   | NM_001142617.1 | NP_001136089.1 | Q9BX79 |
| 132 | CYP3A4  | NM_001202855.2 | NP_001189784.1 | P08684 |
| 133 | CYP2C8  | NM_000770.3    | NP_000761.3    | P10632 |
| 134 | ALDH1A1 | NM_000689.4    | NP_000680.2    | P00352 |
| 135 | ADH7    | NM_000673.4    | NP_000664.2    | P40394 |
| 136 | CRABP1  | NM_004378.2    | NP_004369.1    | P29762 |
| 137 | RPE65   | NM_000329.2    | NP_000320.1    | Q16518 |
| 138 | ALDH1A2 | NM_001206897.1 | NP_001193826.1 | O94788 |
| 139 | SPHK1   | NM_001142601.1 | NP_001136073.1 | Q9NYA1 |
| 140 | SOX9    | NM_000346.3    | NP_000337.1    | P48436 |
